# Supplementary material for: A unique white electroluminescent one-dimensional europium(iii) coordination polymer
Source: Royal Society of Chemistry journal article supplement (doi:10.1039/c4tc02604g), 2014-12-10
Supplement: c4tc02604g1.pdf [file c4tc02604g1.pdf]

## Electronic Supplementary Information

# A Unique White Electroluminescent One-Dimensional Europium(III) Coordination Polymer

Hui Xu,<sup>\*a,c</sup> Jianzhe Wang,<sup>a</sup> Ying Wei,<sup>ac</sup> Guohua Xie,<sup>\*b</sup> Qin Xue,<sup>b</sup> Zhaopeng Deng,<sup>a</sup>  
Wei Huang<sup>\*c</sup>

<sup>a</sup>Key Laboratory of Functional Inorganic Material Chemistry, Ministry of Education, School of Chemistry and Materials, Heilongjiang University, 74 Xuefu Road, Harbin 150080, P. R. China

<sup>b</sup>Organic Semiconductor Centre, SUPA, School of Physics and Astronomy, University of St Andrews, North Haugh, St Andrews, KY16 9SS, United Kingdom

<sup>c</sup>Institute of Advanced Materials (IAM), Nanjing University of Technology, Nanjing 211816, P.R. China

## Content

|                                                                                   |   |
|-----------------------------------------------------------------------------------|---|
| Table S1. Crystal data and structure refinement of Eu-FDPO.....                   | 2 |
| Table S2. Selected bond lengths (Å) and angles (degree) of Eu-FDPO.....           | 3 |
| Table S3. Physical properties of Eu-FDPO.....                                     | 4 |
| Particle Size Distribution of Eu-FDPO in DMSO Solution.....                       | 5 |
| DFT Calculation Results of Eu-FDPO.....                                           | 6 |
| Electrical Properties of Eu-FDPO.....                                             | 7 |
| Table S4. EL performance of representative Eu <sup>3+</sup> metallopolymers. .... | 8 |
| References.....                                                                   | 9 |

**Table S1.** Crystal data and structure refinement of **Eu-FDPO**.

|                                                  |                                                                  |
|--------------------------------------------------|------------------------------------------------------------------|
| Formula                                          | C <sub>94</sub> H <sub>69</sub> Eu O <sub>8</sub> P <sub>2</sub> |
| Formula weight                                   | 1540.39                                                          |
| T (K)                                            | 293(2)                                                           |
| Crystal system                                   | Monoclinic                                                       |
| Space group                                      | C 2/C                                                            |
| a (Å)                                            | 52.7880(17)                                                      |
| b (Å)                                            | 12.4054(3)                                                       |
| c (Å)                                            | 25.0467(8)                                                       |
| β (deg)                                          | 113.292(4)                                                       |
| V (Å <sup>3</sup> )                              | 15065.3(8)                                                       |
| Z                                                | 8                                                                |
| ρ (g/cm <sup>3</sup> )                           |                                                                  |
| μ (mm <sup>-1</sup> )                            | 1.358                                                            |
| F(000)                                           | 6320                                                             |
| crystal size (mm)                                | 0.30 × 0.25 × 0.21                                               |
| θ (deg)                                          | 3.06 to 26.00                                                    |
|                                                  | -64 ≤ h ≤ 60                                                     |
| Index ranges                                     | -15 ≤ k ≤ 15                                                     |
|                                                  | -28 ≤ l ≤ 30                                                     |
| Absorption correction                            | Multi-scan                                                       |
| Max. and min. transmission                       | 0.8279 and 0.7668                                                |
| GOF on F <sup>2</sup>                            | 1.056                                                            |
| R1, R2 [I > 2σ (I)]                              | 0.0367, 0.0771                                                   |
| R1, R2 (all data)                                | 0.0620, 0.0853                                                   |
| Largest diff. peak and hole (e.Å <sup>-3</sup> ) | 0.811 and -0.709                                                 |

**Table S2.** Selected bond lengths (Å) and angles (degree) of **Eu-FDPO**.

| Bond length (Å) |            |        |            |
|-----------------|------------|--------|------------|
| Eu1-O3          | 2.341(2)   | P1-O4  | 1.485(2)   |
| Eu1-O8          | 2.3468(19) | P1-C72 | 1.791(3)   |
| Eu1-O4          | 2.3627(18) | P1-C78 | 1.793(3)   |
| Eu1-O7          | 2.364(2)   | P1-C61 | 1.794(3)   |
| Eu1-O1          | 2.3858(19) | P2-O2  | 1.4817(18) |
| Eu1-O2          | 2.4148(18) | P2-C75 | 1.793(3)   |
| Eu1-O6          | 2.448(2)   | P2-C76 | 1.797(3)   |
| Eu1-O5          | 2.451(2)   | P2-C85 | 1.803(3)   |

  

| Bond angle (°) |           |             |            |
|----------------|-----------|-------------|------------|
| O3-Eu1-O8      | 104.52(8) | O3-Eu1-O5   | 81.22(8)   |
| O3-Eu1-O4      | 146.32(7) | O8-Eu1-O5   | 68.63(7)   |
| O8-Eu1-O4      | 88.51(8)  | O4-Eu1-O5   | 74.81(7)   |
| O3-Eu1-O7      | 94.85(8)  | O7-Eu1-O5   | 144.68(7)  |
| O8-Eu1-O7      | 144.72(8) | O1-Eu1-O5   | 71.14(7)   |
| O4-Eu1-O7      | 91.39(7)  | O2-Eu1-O5   | 125.87(7)  |
| O3-Eu1-O1      | 71.63(7)  | O6-Eu1-O5   | 131.46(7)  |
| O8-Eu1-O1      | 139.66(7) | O4-P1-C72   | 114.07(14) |
| O4-Eu1-O1      | 78.35(7)  | O4-P1-C78   | 110.10(13) |
| O7-Eu1-O1      | 74.32(7)  | C72-P1-C78  | 106.75(14) |
| O3-Eu1-O2      | 71.72(7)  | O4-P1-C61   | 110.99(13) |
| O8-Eu1-O2      | 74.04(7)  | C72-P1-C61  | 105.95(14) |
| O4-Eu1-O2      | 141.90(7) | C78-P1-C61  | 108.73(14) |
| O7-Eu1-O2      | 84.79(7)  | O2-P2-C75   | 112.30(12) |
| O1-Eu1-O2      | 135.65(7) | O2-P2-C76A  | 112.38(12) |
| O3-Eu1-O6      | 141.18(7) | C75-P2-C76A | 110.08(13) |
| O8-Eu1-O6      | 76.34(7)  | O2-P2-C85   | 108.73(13) |
| O4-Eu1-O6      | 71.69(7)  | C75-P2-C85  | 105.57(13) |
| O7-Eu1-O6      | 70.21(7)  | C76A-P2-C85 | 107.43(13) |
| O1-Eu1-O6      | 132.23(7) | C73-C83-C69 | 110.9(2)   |
| O2-Eu1-O6      | 71.38(7)  |             |            |

**Table S3.** Physical properties of **Eu-FDPO**.

| Absorption (nm)                      | Emission (nm)                            | PLQY <sup>c</sup> (%)                                                               |
|--------------------------------------|------------------------------------------|-------------------------------------------------------------------------------------|
| 227, 260, 287, 311, 347 <sup>a</sup> | 580, 593, 613, 656, 706 <sup>a</sup>     | 24 <sup>a</sup>                                                                     |
| 246, 304, 364 <sup>b</sup>           | 579, 592, 612, 655, 702 <sup>b</sup>     | 85 <sup>b</sup>                                                                     |
| S <sub>1</sub> /T <sub>1</sub> (eV)  | HOMO/LUMO (eV)                           | $\mu_e/\mu_h^g$ (10 <sup>-7</sup> cm <sup>2</sup> V <sup>-1</sup> s <sup>-1</sup> ) |
| 3.07 <sup>d</sup> /-                 | -5.5 <sup>f</sup> /-2.6 <sup>f</sup>     | 5.4/0.79                                                                            |
| 3.78 <sup>e</sup> /2.42 <sup>e</sup> | -4.851 <sup>e</sup> /-1.068 <sup>e</sup> |                                                                                     |

<sup>a</sup> In CH<sub>2</sub>Cl<sub>2</sub> (10<sup>-5</sup> mol L<sup>-1</sup>); <sup>b</sup> in film; <sup>c</sup> calculated by using Ru(bpy)<sub>3</sub>Cl<sub>2</sub> as standard; <sup>d</sup> estimated according to the absorption edges; <sup>e</sup> DFT calculated results of pendamer; <sup>f</sup> calculated according to the equation HOMO/LUMO = -4.78 - onset voltage of redox peaks; <sup>g</sup> estimated according trap-free space charge limited current model.

### Particle Size Distribution of Eu-FDPO in DMSO Solution

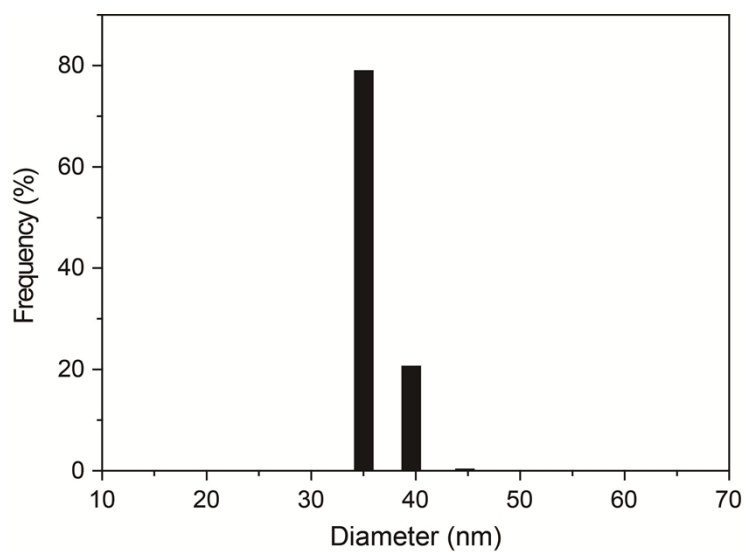

**Figure S1.** Particle size distribution of dilute DMSO solutions of **Eu-FDPO** ( $10^{-1}$  g L $^{-1}$ ) measured by dynamic light scattering technology.

## DFT Calculation Results of Eu-FDPO

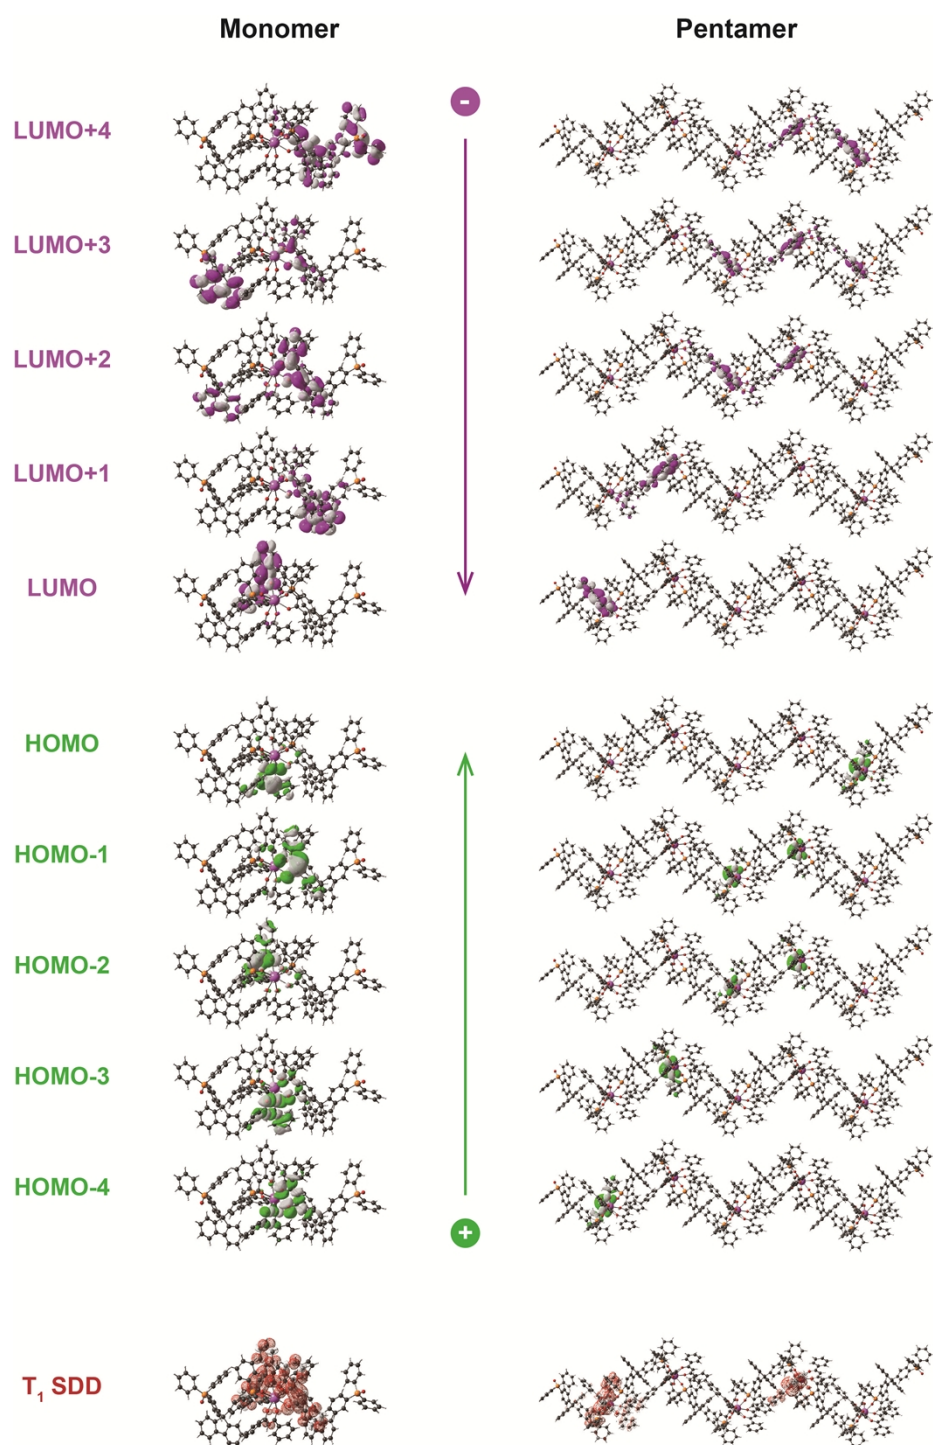

**Figure S2.** Contours of FMOs and T<sub>1</sub> SDD of monomer and pentamer of **Eu-FDPO** by DFT simulation.

## Electrical Properties of Eu-FDPO

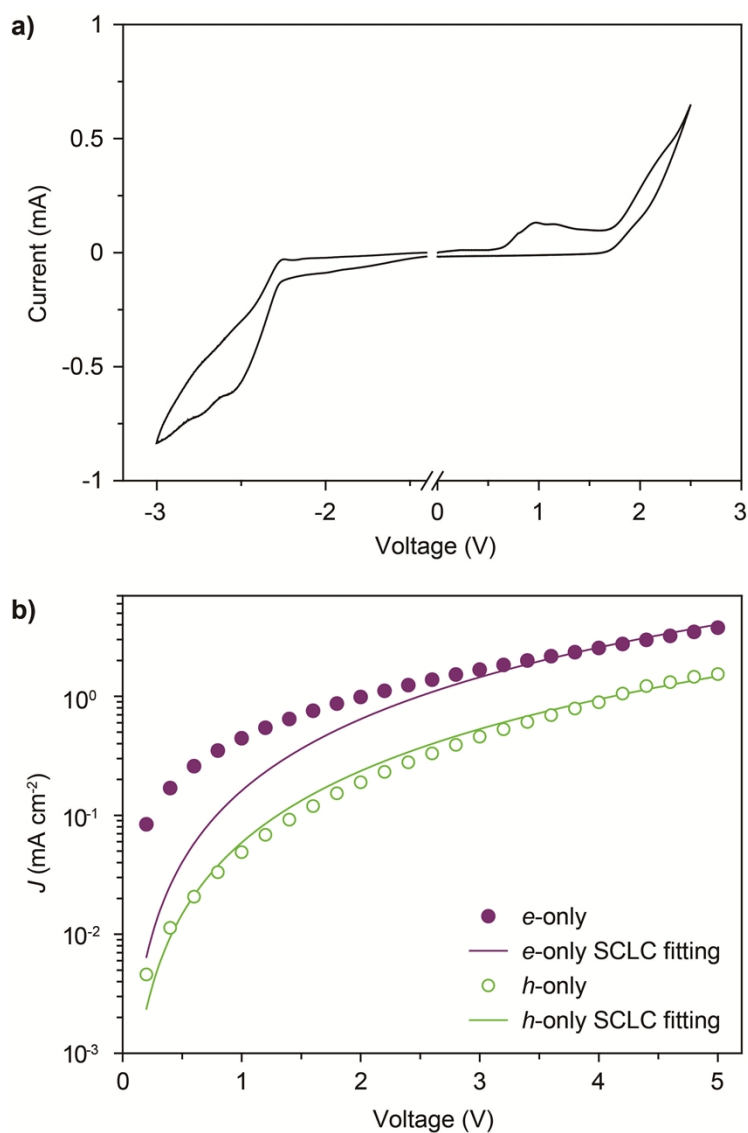

**Figure S3.** a) Cyclic voltammogram of **Eu-FDPO**. The measurement was performed in THF and dichloromethane for reduction and oxidation, respectively, with tetrabutylammonium hexafluorophosphate as electrolyte and a silver/silver nitrate ( $\text{Ag}/\text{Ag}^+$ ) reference electrode at room temperature in nitrogen at a scanning rate of  $100 \text{ mV s}^{-1}$ ; b)  $I$ - $V$  characteristics of nominal single-carrier transporting devices based on **Eu-FDPO** and the corresponding fitting curves by SCLC model.

**Table S4.** EL performance of representative Eu<sup>3+</sup> metallopolymers.

| Ref.      | Polymer Type | Device                                                          | Voltage (V) <sup>a</sup> | $L_{\text{Max}}$ (cd m <sup>-2</sup> ) | Maximum efficiencies <sup>b</sup> | Efficiency roll-offs (%) <sup>c</sup> |    |     | CIE coordinate |
|-----------|--------------|-----------------------------------------------------------------|--------------------------|----------------------------------------|-----------------------------------|---------------------------------------|----|-----|----------------|
|           |              |                                                                 |                          |                                        |                                   | CE                                    | PE | EQE |                |
| [1]       | Wolf-I       | PEDOT:PSS/Eu <sup>3+</sup> polymer:PBD/Ba                       | 12.5, 13.5, 15.5         | 149                                    | 0.41, 0.09, 0.43                  | 26                                    | 33 | 26  | 0.67, 0.33     |
| [2]       | Wolf-I       | PEDOT:PSS/PVK/Eu <sup>3+</sup> polymer:OXD-7/Ba                 | 17, -, -                 | 68                                     | 0.18, 0.03, 0.37                  | -                                     | -  | -   | -, -           |
| [3]       | Wolf-I       | Eu <sup>3+</sup> polymer/LiF/Ca:Ag                              | 8, 15, 18                | 126                                    | 0.56, -, -                        | -                                     | -  | -   | -              |
| [4]       | Wolf-I       | PEDOT:PSS/Eu <sup>3+</sup> polymer/BCP/Alq <sub>3</sub> /LiF/Al | 17, -, -                 | 42                                     | <0.5, 0.035, -                    | -                                     | -  | -   | 0.66, 0.33     |
| [5]       | Wolf-I       | PVK/Eu <sup>3+</sup> polymer/Ba                                 | 15, 25, -                | 11                                     | -, -, 0.07                        | -                                     | -  | -   | -, -           |
| This work | Wolf-III     | PEDOT:PSS/PVK:PBD: <b>Eu-FDPO</b> /Ca ( <b>I</b> )              | 8.8, -, -                | 7                                      | 0.01, 0.003, 0.01                 | -                                     | -  | -   | 0.46, 0.33     |
| This work | Wolf-III     | PEDOT:PSS/PVK:PBD: <b>Eu-FDPO</b> /B3PYMPM/Ca ( <b>II</b> )     | 7.6, 8.4, 10.2           | 215                                    | 0.71, 0.27, 0.37                  | 38                                    | 52 | 38  | 0.38, 0.32     |
| This work | Wolf-III     | PEDOT:PSS/PVK: <b>FDPO:Eu-FDPO</b> /B3PYMPM/Ca ( <b>III</b> )   | 12.5, 13.9, 15.9         | 240                                    | 0.22, 0.05, 0.14                  | 18                                    | 20 | 21  | 0.28, 0.29     |

<sup>a</sup> In the order of onset, 10 and 100 cd m<sup>-2</sup>; <sup>b</sup> in the order of CE (cd A<sup>-1</sup>), PE (lm W<sup>-1</sup>) and EQE (%); <sup>c</sup> at 100 cd m<sup>-2</sup>.



## References

- [1] H. Xu, R. Zhu, P. Zhao and W. Huang, *J. Phys. Chem. C* **2011**, *115*, 15627-15638.
- [2] C. Yang, J. Xu, Y. Zhang, Y. Li, J. Zheng, L. Liang and M. Lu, *J. Mater. Chem. C* **2013**, *1*, 4885-4901.
- [3] Q. D. Ling, Q. J. Cai, E. T. Kang, K. G. Neoh, F. R. Zhu and W. Huang, *J. Mater. Chem.* **2004**, *14*, 2741-2748.
- [4] Z.-G. Zhang, J.-B. Yuan, H.-J. Tang, H. Tang, L.-N. Wang and K.-L. Zhang, *J. Polym. Sci. A* **2009**, *47*, 210-221.
- [5] J. Pei, X.-L. Liu, W.-L. Yu, Y.-H. Lai, Y.-H. Niu and Y. Cao, *Macromolecules* **2002**, *35*, 7274-7280.
